# Supplementary material
Source: publisher site journal article supplement (https://www.dovepress.com/article/581390)
Supplement: Supplementary file 1 [file 581390%20Supplementary%20Material%20v2.docx]

Table S1. Variable coding scheme for Logistic regression model

| Variables | Categorization/Scalability | Coding Scheme |
| --- | --- | --- |
| Long-term care facility residence | Binary | Yes = 1, No = 0 |
| Previous MDRO patient in bed | Binary | Yes = 1, No = 0 |
| Central venous catheterization | Binary | Yes = 1, No = 0 |
| Surgery before infection | Binary | Yes = 1, No = 0 |
| Ventilator utilization | Binary | Yes = 1, No = 0 |
| Glasgow Coma Scale (GCS) | Continuous | Measured score |
| Arterial catheter duration | Continuous | Days of indwelling |
| Platelet count | Continuous | ×10⁹/L |
| Albumin level | Continuous | g/dL |
